# Supplementary material for: Where are the strongest associations between autistic traits and traits of ADHD? evidence from a community-based twin study
Source: Springer Nature journal article supplement (doi:10.1007/s00787-014-0666-0), 2015-01-19
Supplement: MOESM1 [file 8685250]

**Electronic Supplementary Material**

Paper title: Where are the strongest associations between autistic traits and traits of ADHD? Evidence from a community-based twin study

Journal: *European Child & Adolescent Psychiatry*

Authors: Mark J. Taylor1, Tony Charman2, & Angelica Ronald1

Corresponding Author: Mark J. Taylor, Genes Environment Lifespan Laboratory, Centre for Brain and Cognitive Development, Department of Psychological Science, Birkbeck, University of London, UK (email: [mj.taylor@bbk.ac.uk](mailto:mj.taylor@bbk.ac.uk))

**DeFries-Fulker Analysis**

*Table S1 Phenotypic group correlations*

| Outcome  Selection Variable  Variable | CAST  Social | CAST  Communication | CAST  RRBI | Conners ADHD  Hyperactivity/Impulsivity | Conners ADHD  Inattention |
| --- | --- | --- | --- | --- | --- |
| CAST Social | ----- | ----- | ----- | .24 | .31 |
| CAST Communication | ----- | ----- | ----- | .60 | .53 |
| CAST RRBI | ----- | ----- | ----- | .40 | .27 |
| Conners ADHD Hyp/Imp | .25 | .55 | .28 | ----- | ----- |
| Conners ADHD Inatt. | .34 | .55 | .24 | ----- | ----- |

*CAST: Childhood Autism Spectrum Test; CAST Social: CAST social difficulties subscale; CAST Communication: CAST communication atypicalities subscale; CAST RRBI: CAST repetitive, restrictive behaviours and routines subscale*

*Conners ADHD: Conners’ Parent Rating Scale; Conners ADHD Hyp/Imp: Conners ADHD hyperactivity/impulsivity subscale; Conners Inatt: Conners inattention subscale*

*Table S2 Transformed means used in univariate and bivariate analyses*

| Univariate Analyses | | | | |
| --- | --- | --- | --- | --- |
|  | Monozygotic Twins | | Dizygotic Twins | |
| Measure | Proband Mean | Co-twin Mean | Proband Mean | Co-twin Mean |
| CAST Social | 1.00 | .69 | 1.00 | .31 |
| CAST Communication | 1.00 | .79 | 1.00 | .37 |
| CAST RRBI | 1.00 | .73 | 1.00 | .35 |
| Conners ADHD Hyp/Imp | 1.00 | .85 | 1.00 | .41 |
| Conners ADHD Inattention | 1.00 | .70 | 1.00 | .24 |
| Bivariate Analyses | | | | |
|  | Monozygotic Twins | | Dizygotic Twins | |
| Selection -> Outcome | Proband Mean | Co-twin Mean | Proband Mean | Co-twin Mean |
| Social -> Hyp/Imp | 1.00 | .27 | 1.00 | .16 |
| Social -> Inatt. | 1.00 | .30 | 1.00 | .15 |
| Comm. -> Hyp/Imp | 1.00 | .54 | 1.00 | .29 |
| Comm. -> Inatt. | 1.00 | .47 | 1.00 | .22 |
| RRBI -> Hyp/Imp | 1.00 | .41 | 1.00 | .23 |
| RRBI -> Inatt. | 1.00 | .31 | 1.00 | .16 |
| Hyp/Imp -> Social | 1.00 | .21 | 1.00 | .15 |
| Hyp/Imp -> Comm. | 1.00 | .49 | 1.00 | .19 |
| Hyp/Imp -> RRBI | 1.00 | .24 | 1.00 | .12 |
| Inatt. -> Social | 1.00 | .32 | 1.00 | .13 |
| Inatt. -> Comm. | 1.00 | .49 | 1.00 | .14 |
| Inatt. -> RRBI | 1.00 | .21 | 1.00 | .08 |

*CAST: Childhood Autism Spectrum Test; Social: CAST social difficulties subscale; Comm.: CAST communication atypicalities subscale; RRBI: repetitive, restricted behaviours and interests*

*Conners ADHD: Conners’ Parent Rating Scale; Hyp/Imp: Conners ADHD hyperactivity/impulsivity subscale; Inatt: Conners ADHD inattention subscale*

*Note that for univariate analyses, both proband and co-twin means are for the selection measure; for bivariate analyses, the proband mean is for the selection measure, while the co-twin mean is for the outcome variable*

*Table S3 Group heritability and bivariate heritability estimates from DeFries-Fulker analyses*

| Group Heritability | | | | | |
| --- | --- | --- | --- | --- | --- |
| Subscale | | Group Heritability | | 95% CI | |
| CAST Social | | .69 ^ | | .68-.69 | |
| CAST Communication | | .79 ^ | | .77-.79 | |
| CAST RRBI | | .73 ^ | | .67-.73 | |
| Conners ADHD Hyp/Imp | | .85 ^ | | .81-.85 | |
| Conners ADHD Inattention | | .70 ^ | | .70-.96 | |
| Bivariate Heritability | | | | | |
| Selection Variable | Outcome Variable | | Bivariate Heritability | | 95% CI |
| CAST Social | Conners ADHD Hyp/Imp | | .22:.24 | | .16-.25 |
| CAST Social | Conners ADHD Inattention | | .29:.31 | | .22-.33 |
| CAST Communication | Conners ADHD Hyp/Imp | | .50/.60 | | .45-.52 |
| CAST Communication | Conners ADHD Inattention | | .47^:.53 | | .44-.47 |
| CAST RRBI | Conners ADHD Hyp/Imp | | .35:.40 | | .29-.36 |
| CAST RRBI | Conners ADHD Inattention | | .29:.27 | | .26-.33 |
| Conners ADHD Hyp/Imp | CAST Social | | .12:.25 | | .06-.14 |
| Conners ADHD Hyp/Imp | CAST Communication | | .49^:.55 | | .49-.51 |
| Conners ADHD Hyp/Imp | CAST RRBI | | .23:28 | | .18-.26 |
| Conners ADHD Inattention | CAST Social | | .32^:.34 | | .31-.32 |
| Conners ADHD Inattention | CAST Communication | | .49^:.55 | | .49-.77 |
| Conners ADHD Inattention | CAST RRBI | | .21^:24 | | .18-.21 |

*^ Indicates that the estimate was capped at the transformed MZ co-twin mean*

*Note that bivariate heritability estimates are presented as the ratio of bivariate heritability to the phenotypic group correlation*

*CAST: Childhood Autism Spectrum Test; CAST Social: CAST social difficulties subscale; CAST Communication: CAST communication atypicalities subscale; CAST RRBI: CAST repetitive, restricted behaviours and interests subscale; Conners ADHD: Conners’ Parent Rating Scale; Conners ADHD Hyp/Imp: Conners ADHD hyperactivity/impulsivity subscale; Conners ADHD Inattention: Conners ADHD inattention subscale*
